# Supplementary material for: Changes in stratospheric aerosol extinction coefficient after the 2018 Ambae eruption as seen by OMPS-LP and MAECHAM5-HAM
Source: Copernicus journal article supplement (doi:10.5194/acp-21-14871-2021), 2021-10-07
Supplement: Supplementary file [file acp-21-14871-2021-supplement.pdf]

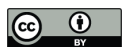

*Supplement of*

**Changes in stratospheric aerosol extinction coefficient after the 2018 Ambae eruption as seen by OMPS-LP and MAECHAM5-HAM**

**Elizaveta Malinina et al.**

*Correspondence to:* Alexei Rozanov ([alex@iup.physik.uni-bremen.de](mailto:alex@iup.physik.uni-bremen.de))

The copyright of individual parts of the supplement might differ from the article licence.

## Supplementary material

In Figure S1, we present the results of MAECHAM5-HAM simulations of the 2018 Ambae eruptions similar to those presented in Section 4.1.2, but without nudging of meteorological data.

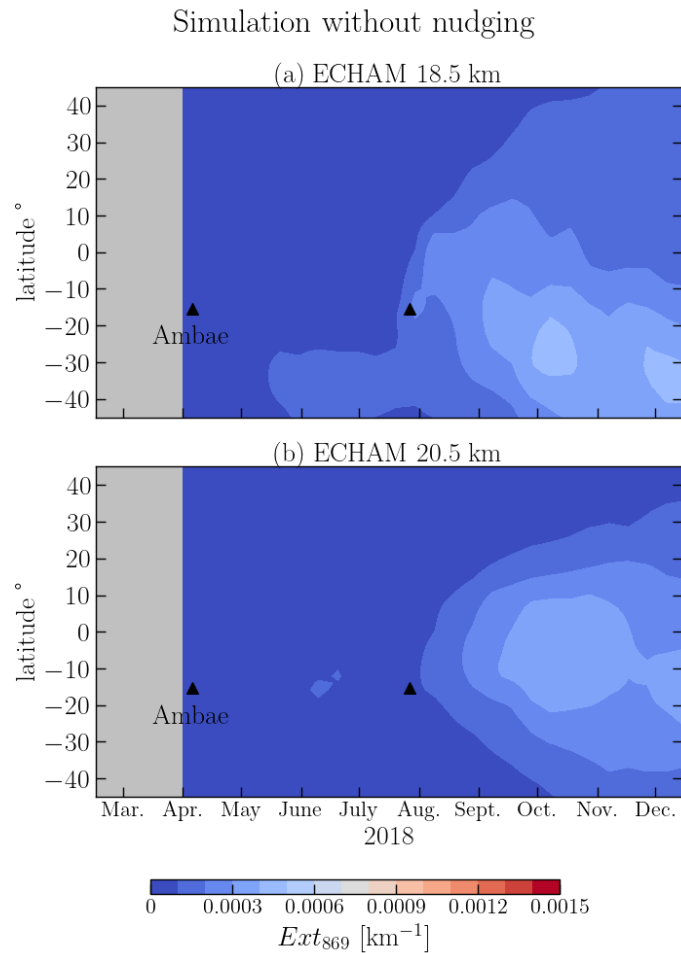

Figure S1: The evolution of the aerosol extinction coefficient ( $Ext_{869}$ ) at 18.5 and 20.5 km altitude after the Ambae eruptions of 2018 from MAECHAM5-HAM simulation without nudging. The dataset were averaged over 10 day periods.
